# Supplementary material
Source: ML conference proceedings conference paper supplement (https://proceedings.neurips.cc/paper_files/paper/2020/hash/567b8f5f423af15818a068235807edc0-Abstract.html)
Supplement: Supplementary file 61 [file reader_1.xlsx]

## Sheet: Sheet1
				The volumes you have been given show reconstructions using 3 different methods. The names of the methods are randomized separately for each volume. These reconstructions may show horizontal banding artifacts in some regions, which may be easy to spot or may be very difficult to discern. Banding may be much more visible in some anatomical structures than others, and is often easiest to see in high…
	Is any banding present (yes, No)			Rank the 3 methods in terms of the amount of visible banding			Rank the 3 methods in terms of the retention of fine anatomical detail in comparison to the ground truth
Patient ID	A	B	C	Most banding	2nd most banding	Least banding	Most detailed	2nd least detailed	Least detailed
3-1001959	Y	N	Y	C	A	B	B	C	A
3-1001533	Y	N	Y	C	A	B	B	C	A
3-1001122	Y	Y	N	B	A	C	A	B	C
3-1000748	Y	Y	N	B	A	C	C	B	A
3-1000480	Y	N	Y	C	A	B	A	B	C
3-1000432	Y	Y	N	A	B	C	C	A	B
3-1000323	N	Y	Y	B	C	A	B	A	C
3-1000254	N	Y	Y	B	C	A	C	A	B
3-1000071	Y	N	Y	C	A	B	C	A	B
3-1000052	Y	N	Y	A	C	B	B	A	C
4-1001977	N	Y	Y	B	C	A	A	B	C
4-1001818	Y	Y	N	A	B	C	B	A	C
4-1001703	Y	Y	N	A	B	C	C	A	B
4-1001450	Y	Y	N	A	B	C	A	B	C
4-1000925	Y	Y	N	B	A	C	B	C	A
4-1000885	Y	N	Y	C	A	B	A	B	C
4-1000647	Y	N	Y	A	C	B	A	B	C
4-1000537	N	Y	Y	B	C	A	C	A	B
4-1000267	Y	Y	Y	A	C	B	A	B	C
4-1000206	Y	Y	N	A	B	C	C	B	A
Reader name:
