# Supplementary material
Source: ML conference proceedings conference paper supplement (https://proceedings.neurips.cc/paper_files/paper/2020/hash/567b8f5f423af15818a068235807edc0-Abstract.html)
Supplement: Supplementary file 62 [file reader_1_cleaned.xlsx]

## Sheet: Sheet1
Patient ID	A	B	C	Most banding	2nd most banding	Least banding	Most detailed	2nd least detailed	Least detailed
1001959	Y	N	Y	C	A	B	B	C	A
1001533	Y	N	Y	C	A	B	B	C	A
1001122	Y	Y	N	B	A	C	A	B	C
1000748	Y	Y	N	B	A	C	C	B	A
1000480	Y	N	Y	C	A	B	A	B	C
1000432	Y	Y	N	A	B	C	C	A	B
1000323	N	Y	Y	B	C	A	B	A	C
1000254	N	Y	Y	B	C	A	C	A	B
1000071	Y	N	Y	C	A	B	C	A	B
1000052	Y	N	Y	A	C	B	B	A	C
1001977	N	Y	Y	B	C	A	A	B	C
1001818	Y	Y	N	A	B	C	B	A	C
1001703	Y	Y	N	A	B	C	C	A	B
1001450	Y	Y	N	A	B	C	A	B	C
1000925	Y	Y	N	B	A	C	B	C	A
1000885	Y	N	Y	C	A	B	A	B	C
1000647	Y	N	Y	A	C	B	A	B	C
1000537	N	Y	Y	B	C	A	C	A	B
1000267	Y	Y	Y	A	C	B	A	B	C
1000206	Y	Y	N	A	B	C	C	B	A
