# Supplementary material
Source: ML conference proceedings conference paper supplement (https://proceedings.neurips.cc/paper_files/paper/2020/hash/567b8f5f423af15818a068235807edc0-Abstract.html)
Supplement: Supplementary file 64 [file reader_2_cleaned.xlsx]

## Sheet: Sheet1
Patient ID	A	B	C	Most banding	2nd most banding	Least banding	Least detailed	2nd least detailed	Most detailed
1001557	Y	Y	Y	B	C	A	A	C	B
1001031	Y	Y	Y	C	A	B	C	B	A
1000758	Y	Y	Y	A	B	C	B	C	A
1000350	Y	Y	N	A	B	C	B	A	C
1000328	Y	Y	N	B	A	C	A	B	C
1000247	Y	Y	Y	A	C	B	C	B	A
1000153	Y	Y	Y	A	B	C	B	A	C
1000114	Y	Y	Y	C	A	B	C	A	B
1000073	Y	Y	Y	A	B	C	C	B	A
1000017	Y	Y	Y	B	A	C	B	A	C
1001959	Y	Y	Y	C	A	B	B	A	C
1001533	Y	Y	Y	C	A	B	A	B	C
1001122	Y	Y	Y	C	B	A	A	C	B
1000748	Y	Y	Y	B	A	C	A	B	C
1000480	Y	Y	Y	A	C	B	B	C	A
1000432	N	N	Y	C	N/A	N/A	B	A	C
1000323	N	N	Y	C	N/A	N/A	C	B	A
1000254	Y	Y	Y	C	B	A	B	A	C
1000071	N	N	Y	C	N/A	N/A	B	A	C
1000052	N	Y	Y	C	B	A	A	C	B
