# Supplementary material
Source: ML conference proceedings conference paper supplement (https://proceedings.neurips.cc/paper_files/paper/2020/hash/567b8f5f423af15818a068235807edc0-Abstract.html)
Supplement: Supplementary file 65 [file reader_3.xlsx]

## Sheet: Sheet1
				The volumes you have been given show reconstructions using 3 different methods. The names of the methods are randomized separately for each volume. These reconstructions may show horizontal banding artifacts in some regions, which may be easy to spot or may be very difficult to discern. Banding may be much more visible in some anatomical structures than others, and is often easiest to see in high…
	Is any banding present (yes, No)			Rank the 3 methods in terms of the amount of visible banding			Rank the 3 methods in terms of the retention of fine anatomical detail in comparison to the ground truth
Patient ID reader 1	A	B	C	Most banding	2nd most banding	Least banding	Most detailed	2nd least detailed	Least detailed
1002155	yes	yes	yes	A	C	B	B	A	C
1001143	no	yes	yes	C	B	A	A	C	B
1000871	yes	yes	yes	A	C	B	B	C	A
1000308	yes	no	yes	A	C	B	C	B	A
1000264	yes	yes	yes	A	B	C	B	A	C
1001983	yes	yes	yes	A	B	C	B	C	A
1000817	yes	yes	yes	A	B	C	A	B	C
1002412	yes	yes	yes	C	B	A	B	A	C
1000552	yes	No	yes	A	C	B	A	B	C
1000555	yes	yes	yes	B	C	A	B	A	C
reader 2
1001557	yes	yes	yes	C	B	A	C	B	A
1001031	yes	yes	yes	A	C	B	B	A	C
1000758	yes	yes	yes	B	A	C	A	C	B
1000350	yes	yes	yes	A	B	C	A	C	B
1000328	yes	yes	yes	B	A	C	C	B	A
1000247	yes	yes	yes	A	C	B	A	B	C
1000153	yes	yes	yes	A	B	C	C	B	A
1000114	yes	yes	yes	C	A	B	C	B	A
1000073	yes	yes	yes	C	A	B	B	A	C
1000017	yes	yes	yes	A	B	C	B	A	C
										without evidence
Reader name:
