# Supplementary material
Source: ML conference proceedings conference paper supplement (https://proceedings.neurips.cc/paper_files/paper/2020/hash/567b8f5f423af15818a068235807edc0-Abstract.html)
Supplement: Supplementary file 66 [file reader_3_cleaned.xlsx]

## Sheet: Sheet1
Patient ID	A	B	C	Most banding	2nd most banding	Least banding	Most detailed	2nd least detailed	Least detailed
1002155	yes	yes	yes	A	C	B	B	A	C
1001143	no	yes	yes	C	B	A	A	C	B
1000871	yes	yes	yes	A	C	B	B	C	A
1000308	yes	no	yes	A	C	B	C	B	A
1000264	yes	yes	yes	A	B	C	B	A	C
1001983	yes	yes	yes	A	B	C	B	C	A
1000817	yes	yes	yes	A	B	C	A	B	C
1002412	yes	yes	yes	C	B	A	B	A	C
1000552	yes	No	yes	A	C	B	A	B	C
1000555	yes	yes	yes	B	C	A	B	A	C
1001557	yes	yes	yes	C	B	A	C	B	A
1001031	yes	yes	yes	A	C	B	B	A	C
1000758	yes	yes	yes	B	A	C	A	C	B
1000350	yes	yes	yes	A	B	C	A	C	B
1000328	yes	yes	yes	B	A	C	C	B	A
1000247	yes	yes	yes	A	C	B	A	B	C
1000153	yes	yes	yes	A	B	C	C	B	A
1000114	yes	yes	yes	C	A	B	C	B	A
1000073	yes	yes	yes	C	A	B	B	A	C
1000017	yes	yes	yes	A	B	C	B	A	C
