# Supplementary material
Source: ML conference proceedings conference paper supplement (https://proceedings.neurips.cc/paper_files/paper/2020/hash/567b8f5f423af15818a068235807edc0-Abstract.html)
Supplement: Supplementary file 67 [file reader_4.xlsx]

## Sheet: Sheet1
				The volumes you have been given show reconstructions using 3 different methods. The names of the methods are randomized separately for each volume. These reconstructions may show horizontal banding artifacts in some regions, which may be easy to spot or may be very difficult to discern. Banding may be much more visible in some anatomical structures than others, and is often easiest to see in high…
	Is any banding present (yes, No)			Rank the 3 methods in terms of the amount of visible banding			Rank the 3 methods in terms of the retention of fine anatomical detail in comparison to the ground truth
Patient ID	A	B	C	Most banding	2nd most banding	Least banding	Least detailed	2nd least detailed	Most detailed
reader2^1001557	yes	yes	yes	B	C	A	B	A	C
reader2^1001031	yes	yes	yes	A	C	B	C	A	B
reader2^1000758	yes	yes	yes	B	A	C	B	C	A
reader2^1000350	yes	yes	yes	B	A	C	B	C	A
reader2^1000328	yes	yes	yes	B	A	C	A	C	B
reader2^1000247	yes	yes	yes	C	A	B	C	A	B
reader2^1000153	yes	yes	yes	A	B	C	A	C	B
reader2^1000114	yes	yes	yes	C	A	B	A	C	B
reader2^1000073	yes	yes	yes	A	C	B	C	A	B
reader2^1000017	yes	yes	yes	B	A	C	A	B	C
reader4^1001977	yes	yes	yes	B	C	A	C	A	B
reader4^1001818	yes	yes	yes	A	B	C	B	A	C
reader4^1001703	yes	yes	yes	A	B	C	B	A	C
reader4^1001450	yes	yes	yes	B	A	C	A	B	C
reader4^1000925	yes	yes	yes	B	A	C	A	C	B
reader4^1000885	yes	yes	yes	A	C	B	C	A	B
reader4^1000647	yes	yes	yes	A	C	B	C	A	B
reader4^1000537	yes	yes	yes	B	C	A	A	B	C
reader4^1000267	yes	yes	yes	A	C	B	C	B	A
reader4^1000206	yes	yes	yes	A	C	B	C	B	A
Reader name:	Dana Lin
