# Supplementary material
Source: ML conference proceedings conference paper supplement (https://proceedings.neurips.cc/paper_files/paper/2020/hash/567b8f5f423af15818a068235807edc0-Abstract.html)
Supplement: Supplementary file 68 [file reader_4_cleaned.xlsx]

## Sheet: Sheet1
Patient ID	A	B	C	Most banding	2nd most banding	Least banding	Least detailed	2nd least detailed	Most detailed
1001557	yes	yes	yes	B	C	A	B	A	C
1001031	yes	yes	yes	A	C	B	C	A	B
1000758	yes	yes	yes	B	A	C	B	C	A
1000350	yes	yes	yes	B	A	C	B	C	A
1000328	yes	yes	yes	B	A	C	A	C	B
1000247	yes	yes	yes	C	A	B	C	A	B
1000153	yes	yes	yes	A	B	C	A	C	B
1000114	yes	yes	yes	C	A	B	A	C	B
1000073	yes	yes	yes	A	C	B	C	A	B
1000017	yes	yes	yes	B	A	C	A	B	C
1001977	yes	yes	yes	B	C	A	C	A	B
1001818	yes	yes	yes	A	B	C	B	A	C
1001703	yes	yes	yes	A	B	C	B	A	C
1001450	yes	yes	yes	B	A	C	A	B	C
1000925	yes	yes	yes	B	A	C	A	C	B
1000885	yes	yes	yes	A	C	B	C	A	B
1000647	yes	yes	yes	A	C	B	C	A	B
1000537	yes	yes	yes	B	C	A	A	B	C
1000267	yes	yes	yes	A	C	B	C	B	A
1000206	yes	yes	yes	A	C	B	C	B	A
