# Supplementary material
Source: ML conference proceedings conference paper supplement (https://proceedings.neurips.cc/paper_files/paper/2020/hash/567b8f5f423af15818a068235807edc0-Abstract.html)
Supplement: Supplementary file 70 [file reader_5_cleaned.xlsx]

## Sheet: Sheet1
Patient ID	A	B	C	Most banding	2nd most banding	Least banding	Least detailed	2nd least detailed	Most detailed
1001977	No	Yes	Yes	B	C	A	B	A	C
1001818	Yes	Yes	Yes	A	B	C	B	A	C
1001703	Yes	Yes	Yes	A	B	C	A	B	C
1001450	Yes	Yes	Yes	B	C	A	A	C	B
1000925	Yes	Yes	Yes	C	B	A	C	A	B
1000885	Yes	No	Yes	C	A	B	B	A	C
1000647	Yes	Yes	Yes	A	C	B	C	A	B
1000537	No	Yes	Yes	C	B	A	A	B	C
1000267	Yes	Yes	Yes	C	A	B	C	A	B
1000206	Yes	Yes	Yes	A	C	B	A	B	C
1002155	Yes	Yes	Yes	A	C	B	B	C	A
1001143	Yes	Yes	Yes	C	B	A	A	C	B
1000871	Yes	Yes	Yes	A	B	C	A	B	C
1000308	Yes	Yes	Yes	A	B	C	C	B	A
1000264	Yes	Yes	Yes	B	C	A	C	B	A
1001983	Yes	Yes	No	B	C	A	C	B	A
1000817	Yes	Yes	Yes	C	B	A	A	C	B
1002412	Yes	Yes	Yes	C	B	A	A	B	C
1000552	Yes	Yes	Yes	B	C	A	A	C	B
1000555	Yes	Yes	Yes	B	C	A	A	C	B
