# Supplementary material
Source: ML conference proceedings conference paper supplement (https://proceedings.neurips.cc/paper_files/paper/2020/hash/567b8f5f423af15818a068235807edc0-Abstract.html)
Supplement: Supplementary file 71 [file reader_6.xlsx]

## Sheet: Sheet1
				The volumes you have been given show reconstructions using 3 different methods. The names of the methods are randomized separately for each volume. These reconstructions may show horizontal banding artifacts in some regions, which may be easy to spot or may be very difficult to discern. Banding may be much more visible in some anatomical structures than others, and is often easiest to see in high…
	Is any banding present (yes, No)			Rank the 3 methods in terms of the amount of visible banding			Rank the 3 methods in terms of the retention of fine anatomical detail in comparison to the ground truth
Patient ID	A	B	C	Most banding	2nd most banding	Least banding	Least detailed	2nd least detailed	Most detailed
READER 1
1002155	yes	yes	yes	C	A	B	C	B	A
1001143	yes	yes	yes	C	B	A	A	B	C
1000871	yes	no	yes	C	A	B	A	C	B
1000308	yes	yes	yes	C	B	A	C	A	B
1000264	yes	yes	yes	A	B	C	A	C	B
1001983	yes	yes	no	B	A	C	A	B	C
1000817	yes	no	yes	C	A	B	A	C	B
1002412	yes	yes	yes	B	C	A	B	A	C
1000552	yes	yes	yes	C	A	B	B	A	C
1000555	yes	yes	yes	C	B	A	C	A	B
READER 3
1001959	yes	yes	yes	C	A	B	A	B	C
1001533	yes	yes	yes	A	C	B	A	C	B
1001122	yes	yes	yes	B	A	C	C	A	B
1000748	yes	yes	yes	A	B	C	A	C	B
1000480	yes	yes	yes	A	C	B	C	A	B
1000432	yes	no	yes	C	A	B	C	B	A
1000323	no	yes	yes	B	C	A	B	C	A
1000254	yes	yes	yes	B	C	A	B	A	C
1000071	yes	yes	yes	A	C	B	A	C	B
1000052	yes	yes	yes	C	B	A	A	C	B
Reader name:
