# Supplementary material
Source: ML conference proceedings conference paper supplement (https://proceedings.neurips.cc/paper_files/paper/2020/hash/567b8f5f423af15818a068235807edc0-Abstract.html)
Supplement: Supplementary file 72 [file reader_6_cleaned.xlsx]

## Sheet: Sheet1
Patient ID	A	B	C	Most banding	2nd most banding	Least banding	Least detailed	2nd least detailed	Most detailed
1002155	yes	yes	yes	C	A	B	C	B	A
1001143	yes	yes	yes	C	B	A	A	B	C
1000871	yes	no	yes	C	A	B	A	C	B
1000308	yes	yes	yes	C	B	A	C	A	B
1000264	yes	yes	yes	A	B	C	A	C	B
1001983	yes	yes	no	B	A	C	A	B	C
1000817	yes	no	yes	C	A	B	A	C	B
1002412	yes	yes	yes	B	C	A	B	A	C
1000552	yes	yes	yes	C	A	B	B	A	C
1000555	yes	yes	yes	C	B	A	C	A	B
1001959	yes	yes	yes	C	A	B	A	B	C
1001533	yes	yes	yes	A	C	B	A	C	B
1001122	yes	yes	yes	B	A	C	C	A	B
1000748	yes	yes	yes	A	B	C	A	C	B
1000480	yes	yes	yes	A	C	B	C	A	B
1000432	yes	no	yes	C	A	B	C	B	A
1000323	no	yes	yes	B	C	A	B	C	A
1000254	yes	yes	yes	B	C	A	B	A	C
1000071	yes	yes	yes	A	C	B	A	C	B
1000052	yes	yes	yes	C	B	A	A	C	B
